# Supplementary material for: Emodin inhibits invasion and migration of hepatocellular carcinoma cells via regulating autophagy-mediated degradation of snail and β-catenin
Source: PubMed Central journal article supplement (PMC9206273; doi:10.1186/s12885-022-09684-0), 2022-06-18
Supplement: 12885_2022_9684_MOESM1_ESM.pdf [file 12885_2022_9684_MOESM1_ESM.pdf]

**Figure S 5A**

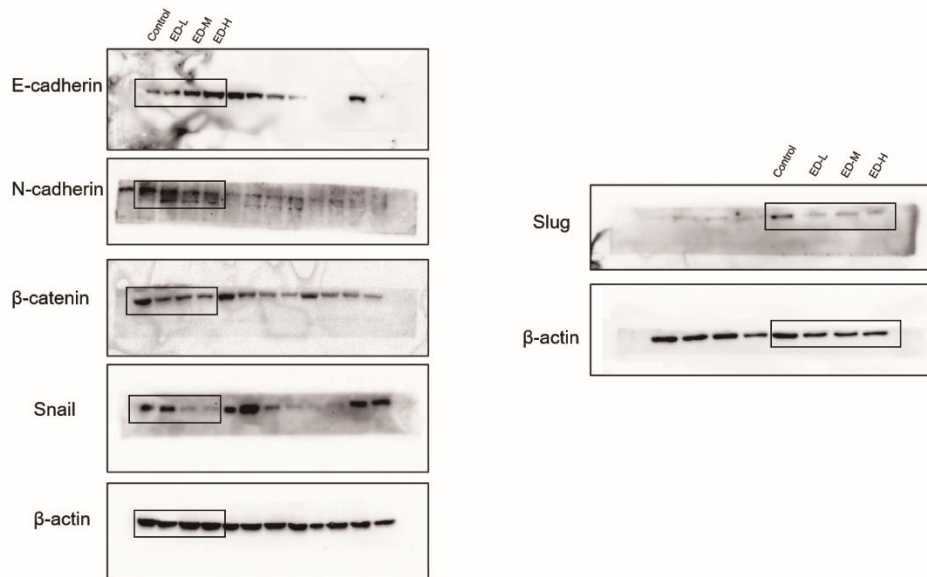

**Figure S 5B**

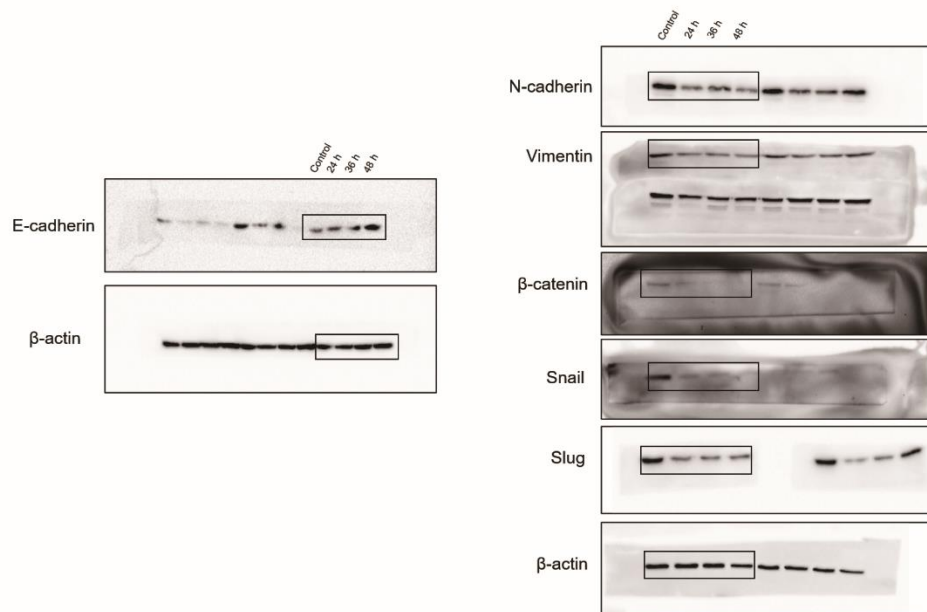

**Fig. S5.** The original gel pictures of Fig. 5. (A) Cells were treated with various concentrations of emodin for 48 h, and then the expression levels of E-cadherin, N-cadherin,  $\beta$ -catenin, Snail, and Slug were tested by western blot. (B) Cells were treated with 60  $\mu$ M emodin for 24, 36, and 48 h, and then the expression levels of E-cadherin, N-cadherin, Vimentin,  $\beta$ -catenin, Snail, and Slug were tested by western blot. The bands framed by the black line have been cropped by the original whole gel images.
