# Supplementary material for: Emodin inhibits invasion and migration of hepatocellular carcinoma cells via regulating autophagy-mediated degradation of snail and β-catenin
Source: PubMed Central journal article supplement (PMC9206273; doi:10.1186/s12885-022-09684-0), 2022-06-18
Supplement: 12885_2022_9684_MOESM3_ESM.pdf [file 12885_2022_9684_MOESM3_ESM.pdf]

**Figure S 7A**

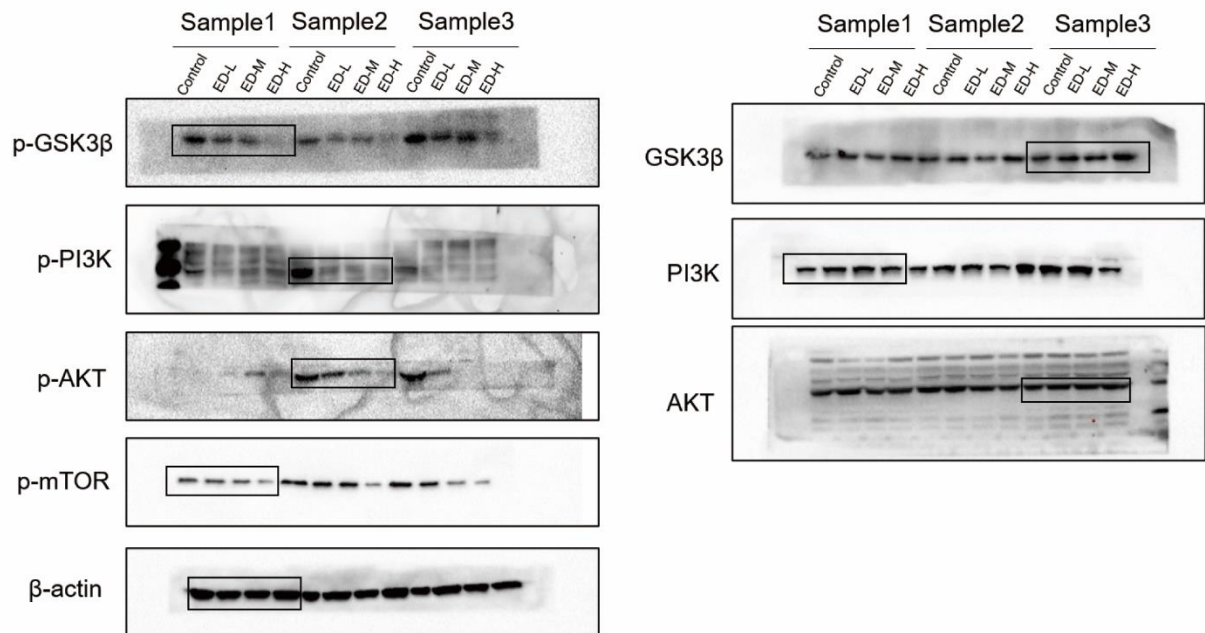

**Figure S 7B**

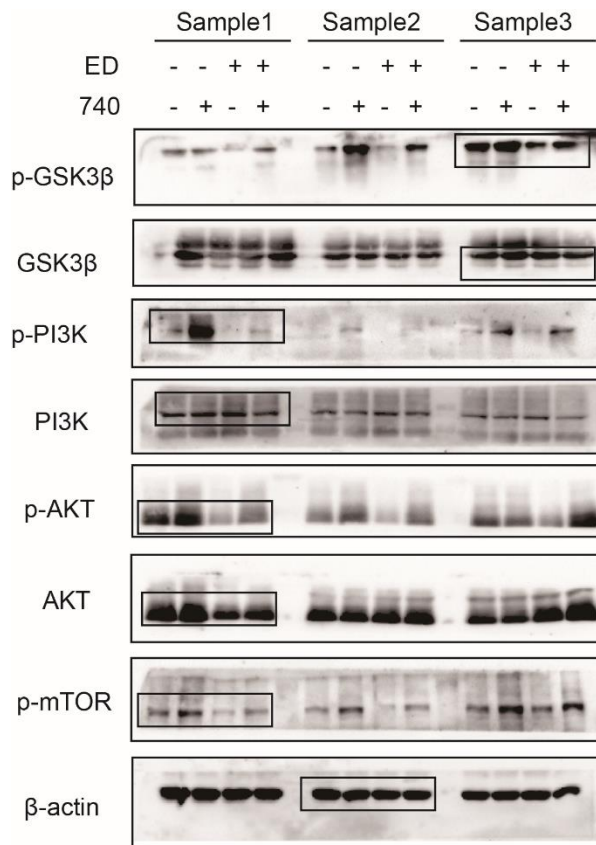

**Fig. S7.** The original gel pictures of Fig. 7. (A) Cells were treated with various concentrations of emodin for 48 h, and then the expression levels of p-GSK3β (Ser9), GSK3β, p-PI3K (Y607), PI3K, p-AKT (Ser473), AKT, and p-mTOR (Ser2448) were detected by western blotting. (B) Cells were pretreated with 15 μM 740 Y-P for 24 h, followed by treatment with 60 μM emodin for 48 h. The bands framed by the black line have been cropped by the original whole gel images.
