# Supplementary material for: Emodin inhibits invasion and migration of hepatocellular carcinoma cells via regulating autophagy-mediated degradation of snail and β-catenin
Source: PubMed Central journal article supplement (PMC9206273; doi:10.1186/s12885-022-09684-0), 2022-06-18
Supplement: 12885_2022_9684_MOESM4_ESM.pdf [file 12885_2022_9684_MOESM4_ESM.pdf]

**Figure S 1**

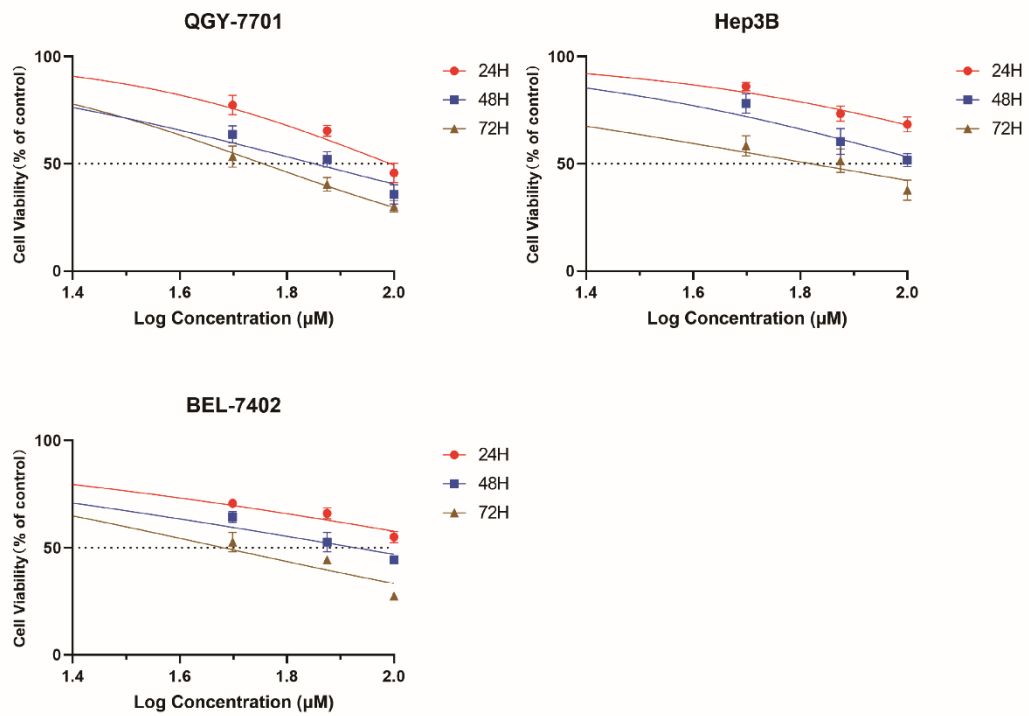

Fig. S1. Emodin inhibited cell viability in a dose- and time-dependent manner. The effect of emodin on the viability of normal liver cells and HCC was examined by MTT. At least three independent experiments were performed ( $n = 6$ ).
