# Supplementary material for: Emodin inhibits invasion and migration of hepatocellular carcinoma cells via regulating autophagy-mediated degradation of snail and β-catenin
Source: PubMed Central journal article supplement (PMC9206273; doi:10.1186/s12885-022-09684-0), 2022-06-18
Supplement: 12885_2022_9684_MOESM5_ESM.pdf [file 12885_2022_9684_MOESM5_ESM.pdf]

**Figure S 2**

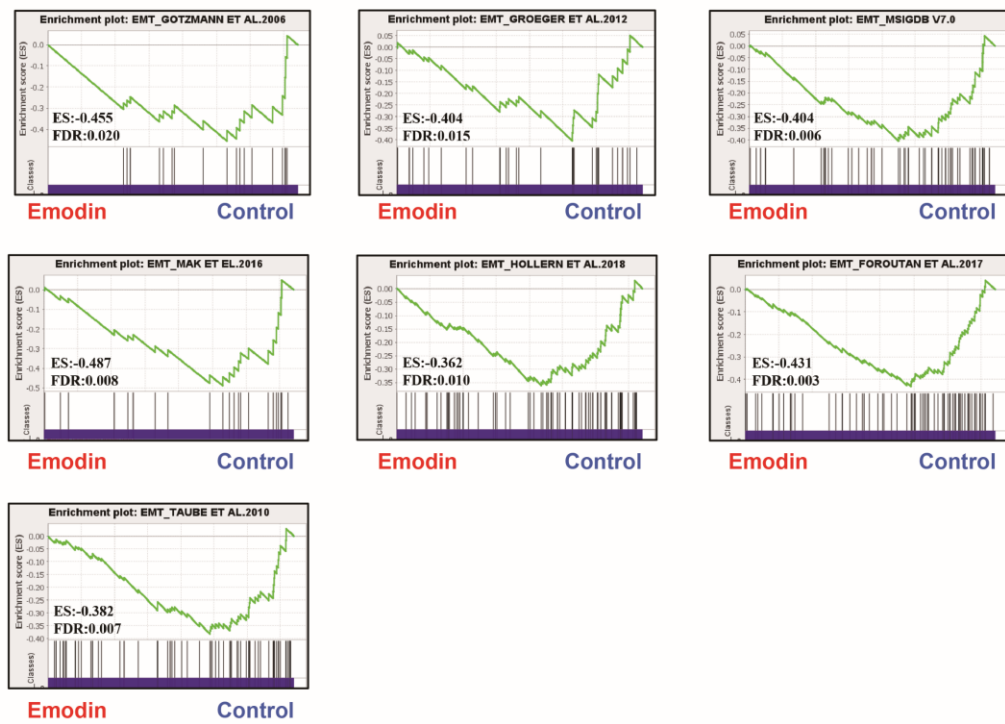

Fig. S2. Gene set enrichment analysis (GSEA) in HepG2 cells. GSEA for down-regulated genes of emodin-treated HepG2 cells in seven EMT-related gene sets.
